# Supplementary material for: Ectopic Expression of Arabidopsis thaliana zDof1.3 in Tomato (Solanum lycopersicum L.) Is Associated with Improved Greenhouse Productivity and Enhanced Carbon and Nitrogen Use
Source: MDPI journal article supplement (doi:10.3390/ijms231911229), 2022-09-23
Supplement: s1 [file s1]

## Supplementary Material

### **Ectopic expression of *Arabidopsis zDof1.3* in tomato (*Solanum lycopersicum* L.) is associated with improved greenhouse productivity through enhanced carbon and nitrogen use**

Kietsuda Luengwilai <sup>1†</sup>, Jingwei Yu<sup>1</sup>, Randi C. Jiménez,<sup>1,§</sup> Andrea Vega<sup>2</sup>, Maysaya Thitisaksakul<sup>1‡</sup>, Shaoyun Dong<sup>1,‡</sup>, Diane M. Beckles<sup>1\*</sup>

<sup>1</sup>Department of Plant Sciences, University of California, One Shields Avenue, Davis CA 95616

<sup>2</sup>Faculty of Engineering and Sciences, Universidad Adolfo Ibáñez. Millennium Nucleus for the Development of Super Adaptable Plants (MN-SAP). Center of Applied Ecology and Sustainability (CAPES), Santiago, Chile.

.

**Figure S1.** Semi-quantitative RT-PCR to detect *AtzDof1.3* in L4080 tissues.

**Figure S2** Leaf sugar content in control and transgenic tomato line L4080.

**Figure S3.** Total sugar content in the developing fruit of control and transgenic tomato line L4080.

**Figure S4** Total N and the Carbon-to-N ratio in control and L4080 plants grown under varying N.

**Figure S5** Root characteristics of tomato control and transgenic Line 4080.

**Figure S6** Pictures of mature control and L4080 tomato plants in the greenhouse.

**Figure S7** PCR amplification of *AtDof1.3* orthologue *SlDof17* in wild tomato species.

**Figure S8** Physiological comparison of wildtype *Arabidopsis* and *AtDof1.3* T<sub>4</sub> (T-DNA insert line).

**Table S1.** Relative levels of metabolites in fruit pericarp sampled at different developmental stages in the control and L4080.

**Table S2.** Changes in gene expression using the GeneChip® Tomato Genome Array.

**Table S3.** Identification of the predicted *cis*-elements motifs in promoters of Dof-regulated genes.

**Table S4.** Members of the Dof gene family with proven roles in altering metabolism and storage product accumulation.

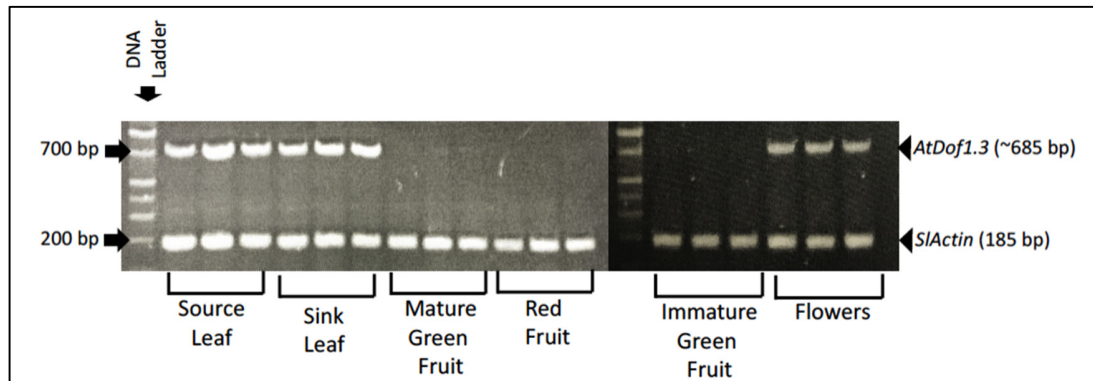

**Figure S1. Agarose gel showing the semi-quantitative RT-PCR products of *AtDof1.3* and actin amplified from different L4080 tissues.** Each RT-PCR reaction consisted of three biological samples derived from RNA harvested from three separate plants. Actin was included in the reaction as a housekeeping control. There was no amplification of *AtDof1.3* in the non-transformed control line (data not shown).

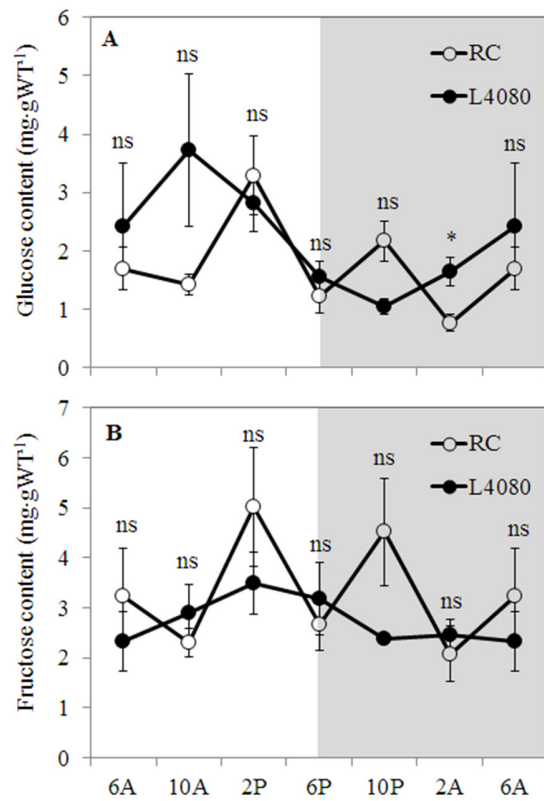

**Figure S2. Leaf sugar content in control and transgenic tomato line L4080.** Changes in leaf carbohydrate content (g.FWT<sup>-1</sup>) during the diel, where the shaded area represents the night period. **A.** Glucose, **B.** Fructose. Data is the mean  $\pm$  SEM of 6 biological replicates. An asterisk indicates data points differing between genotypes ( $P < 0.05$ ). ns = not significant. L4080 is the AtzDof1.3 line, and RC- is the untransformed control.

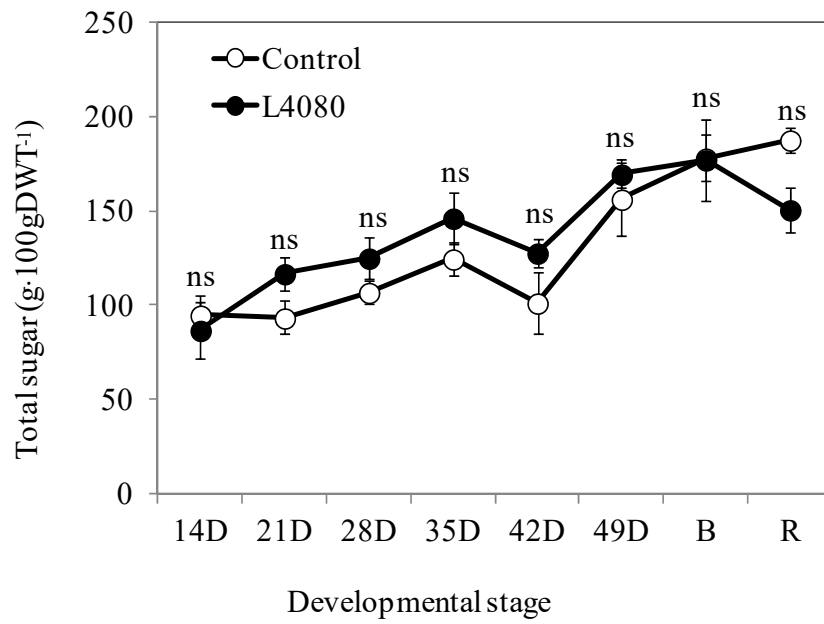

**Figure S3. Total sugar content in the developing fruit of control and transgenic tomato line L4080.** Fruit carbohydrate assayed in the pericarp taken at 7-day intervals during fruit development. DPA – days post anthesis, B- fruit at Breaker stage ~ 63 DPA and RR red ripe ~70 DPA.

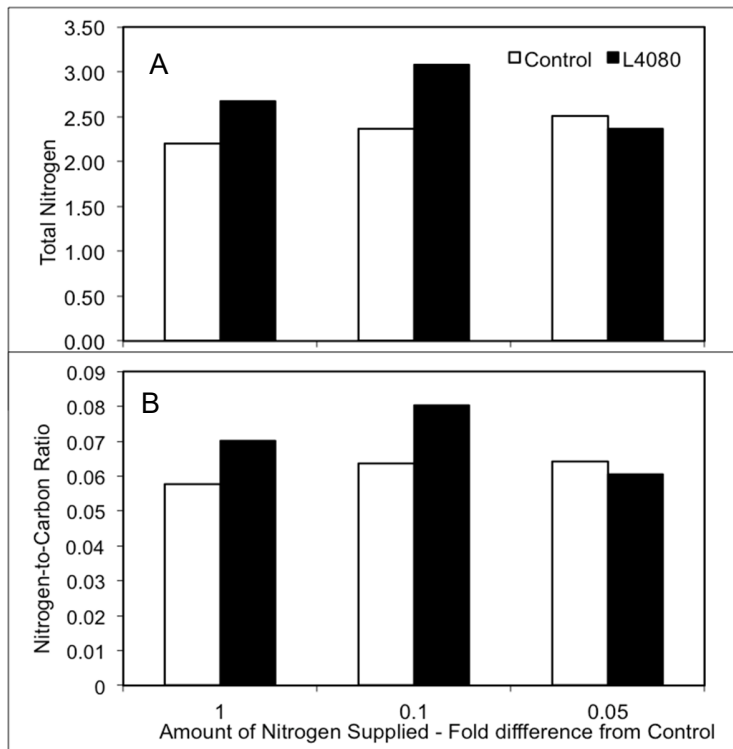

**Figure S4. Total N (A) and the Carbon-to-N ratio (B) in control and L4080 plants grown under varying N.** Six plants of each genotype, grown under each condition was ground and analyzed. Data is for duplicate samples.

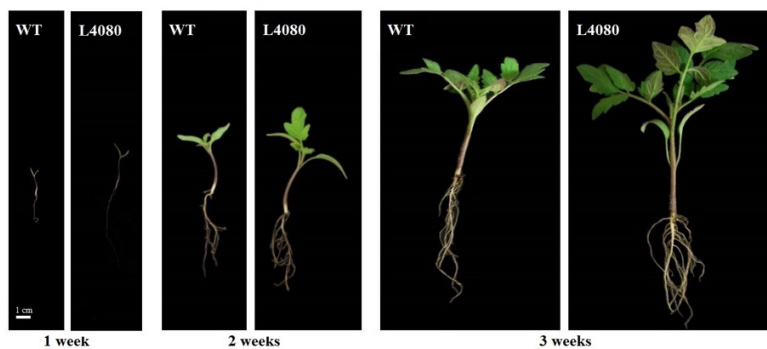

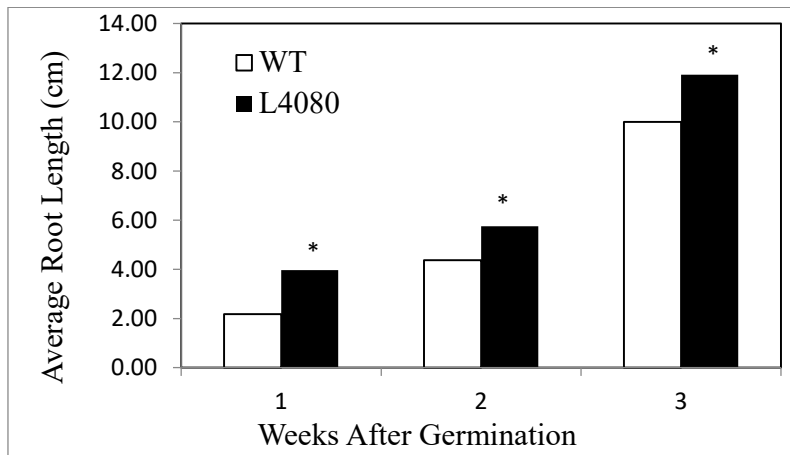

**Figure S5. Root characteristics of tomato control and transgenic Line 4080.** Six plants of each genotype were used for each week of measurement. Plants were grown in one-gallon pots to promote free growth of roots. The plants were carefully extracted from the soil, washed in deionized water, and blotted dry with paper towels. **A)** Each plant was photographed, and representative plants of each genotype are shown. **B)** Root length was measured by taking a digital image and counting the length of the main lateral root in pixels. This measurement considers that the roots are not straight. An ANOVA was performed on the data using SAS9.1.3 (**Figure 2.3**) (Cary, NC).

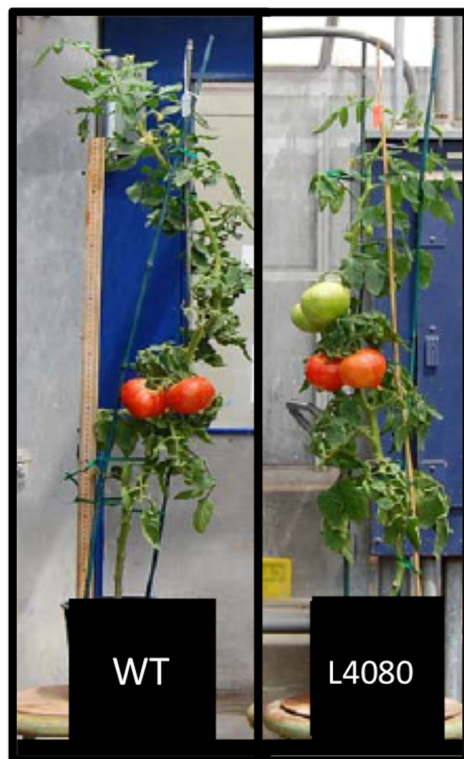

**Figure S6. Pictures of mature control and L4080 tomato plants in the greenhouse.** Plants were pruned to 2 fruit per inflorescence and terminated after the 9<sup>th</sup> truss. There was no significant

difference in plant height, leaf area, rate of leaf appearance, number of trusses when the data collected from 12 plants were averaged.

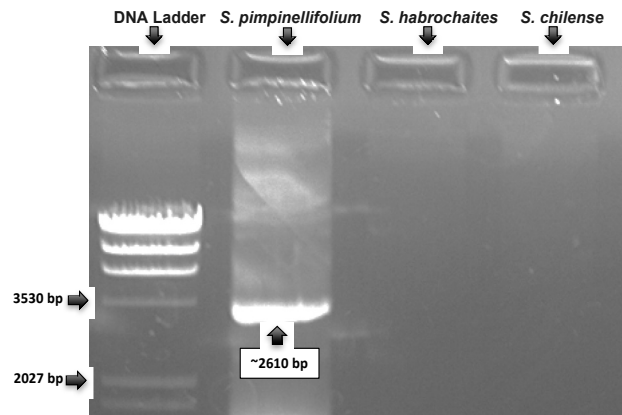

| Primer Name | Primer Sequence            |
|-------------|----------------------------|
| s49         | CCCATCTTACCCCTTTTCA        |
| as885       | CATCACCAGATCAAACATCAAAG    |
| s1021       | TCAGATCGTGAGGGTGTAGC       |
| s1786       | AGCAGGTCGAGTTGAAGCAG       |
| as1846      | TCCATTTGTCCTTGAAGCAG       |
| s2440       | TTCGACTCGTGGTACAATGC       |
| as2830      | AAACTTCAGCTGCATCTTATTATCTC |

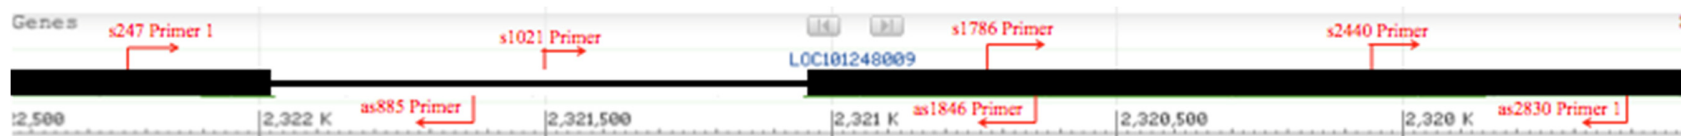

**Figure S7. PCR amplification of wild tomato genomic DNA using *SIDof17* primers.** **A.** PCR product amplified using primers s247 and as2830. There was no amplification from *S. habrochaites* or *S. chilense*. **B, C.** The sequences and primer location relative to each other on *SIDof17*. These different primer combinations were used for various PCR reaction. In our hands, there was no amplification of an orthologue from the wild species. Genomic DNA was extracted from *S. pimpinellifolium*, *S. habrochaites*, *S. chilense*, and *S. lycopersicoides* (not shown). The PCR product was purified using QIAquick gel extraction kit (Qiagen) and ligated into pGEM® T Easy Vector (Promega) for sequencing. *SIDof17* in *S. lycopersicum* (Sequence ID: ) were downloaded from NCBI. The multiple sequences alignment was done using the Clustal Omega <http://www.ebi.ac.uk/Tools/msa/>; (accessed February 25<sup>th</sup> 2017).



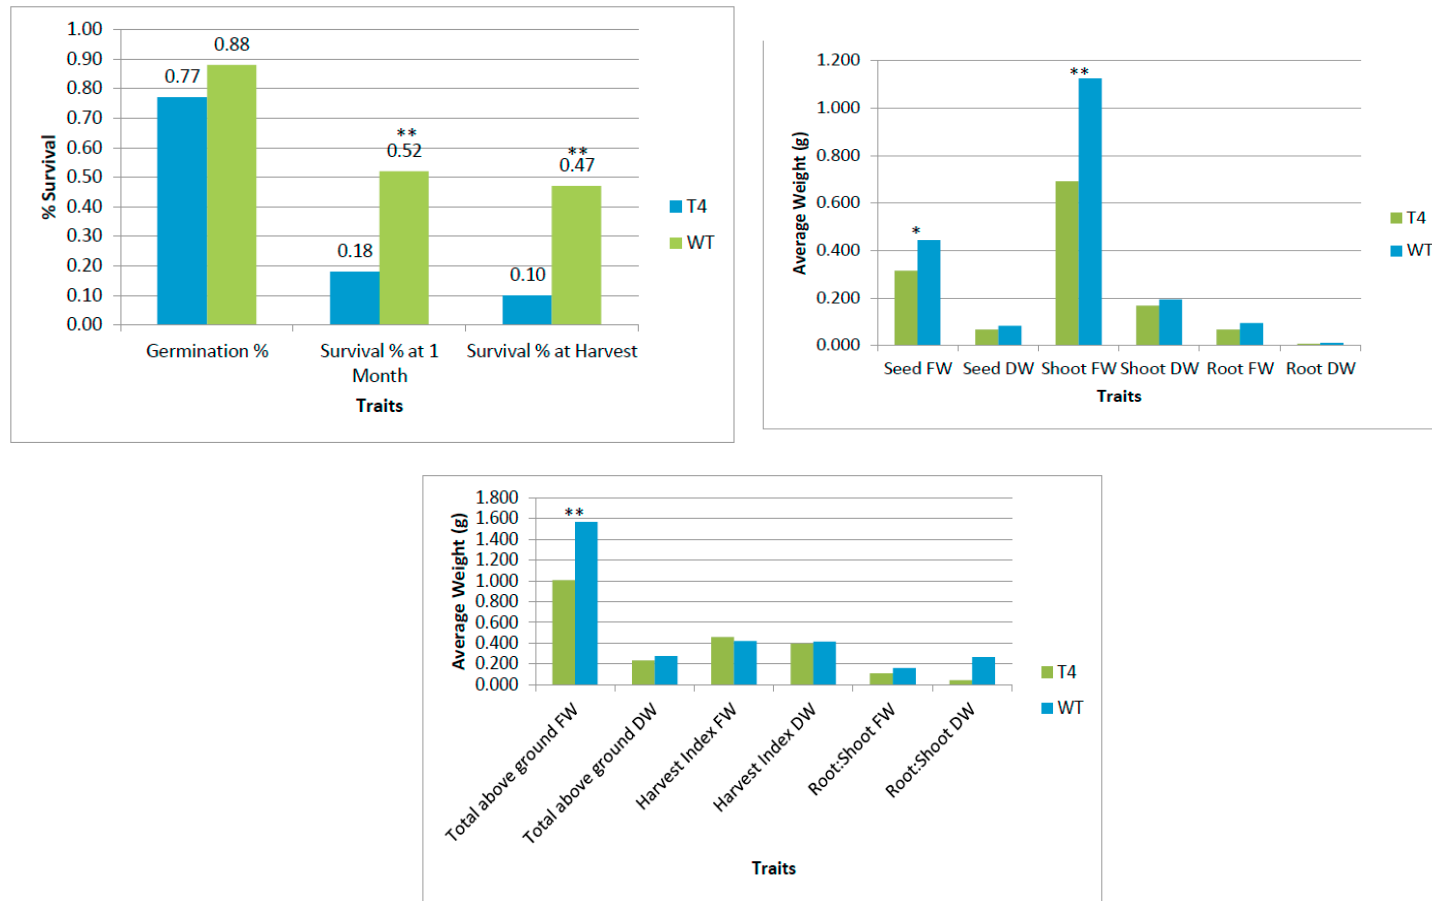

**Figure S8. Physiological comparison of wildtype *Arabidopsis* (WT) and *AtDof1.3* T<sub>4</sub> (T-DNA insert line –T4).** **A.** Average percentages of germination, survival at one month (32 days) and survival at harvest (61 days) **B.** Analyses of individual plant tissue average weights . **C.** Total biomass and ratios of multiple tissues. \* indicates a *p*-value of <0.065, while not significant, is suggestive; \*\* indicates a significant *P*-value of <0.05. This experiment was performed with at least six plants for each genotype for each trait. For dry weight, tissue was dried for 48 hours at 60°C. To analyze the data, an ANOVA was performed using SAS9.1.3 (Cary, NC).

**Table S1.** Relative levels of metabolites in fruit pericarp sampled at different developmental stages in the control and L4080. Emboldened values differ ( $p < 0.05$ ).

| Metabolite                            | Fold-change in L4080 vs. WT |              |              |         |
|---------------------------------------|-----------------------------|--------------|--------------|---------|
|                                       | 14 DPA                      | 21 DPA       | 42 DPA       | Breaker |
| Alanine                               | 14.778                      | 0.487        | 1.048        | 5.650   |
| Aspartate                             | <b>0.210</b>                | 0.457        | 0.589        | 2.259   |
| Benzoate                              | 1.855                       | 0.535        | 1.006        | 1.250   |
| Buturo-1,4-lactam (1TMS)              | 2.269                       | 0.682        | 0.629        | 6.020   |
| Citrate                               | 1.112                       | 0.604        | 0.883        | 1.107   |
| 2-Desoy-pentos-3-ylose dimethoxyamine | 0.899                       | 0.797        | 1.081        | 1.343   |
| Erythronate                           | 0.727                       | 0.611        | 0.999        | 0.688   |
| Fructofuranose 5TMS                   | 1.118                       | 1.865        | 1.360        | 1.574   |
| Fructose MX1                          | 1.050                       | 1.121        | 1.405        | 0.794   |
| Fructose MX2                          | 0.515                       | 1.000        | 2.382        | 0.110   |
| Galactinol Put                        | 1.078                       | <b>0.528</b> | 1.142        | 1.060   |
| Galactonate                           | 0.629                       | 0.712        | 1.032        | 1.136   |
| Glucose MX1                           | 1.223                       | 0.905        | <b>1.384</b> | 1.130   |
| Glucose MX2                           | 1.694                       | 0.817        | 2.001        | 0.966   |
| Glucose-6-P MX1                       | 1.218                       | 0.796        | 0.787        | 3.563   |
| Glucose-6-P MX2                       | 1.162                       | 0.695        | 0.919        | 0.886   |
| Glutamine 3TMS                        | 2.515                       | 1.556        | 0.360        | 1.446   |
| Glycerate                             | 0.968                       | 0.754        | 1.096        | 0.640   |
| Glycerol-3-P                          | 0.756                       | 0.825        | 1.295        | 0.909   |
| Glycine 3TMS                          | 0.658                       | 1.769        | 0.411        | 1.460   |
| Heptadecanoate                        | 0.813                       | 0.600        | 1.614        | 1.013   |
| Hexadecanoate                         | 1.069                       | 0.805        | 1.365        | 0.960   |
| Inositol                              | 0.754                       | 0.815        | 1.327        | 1.272   |
| Inositol-1-P                          | 0.967                       | <b>0.402</b> | 0.485        | 1.259   |
| Isoleucine                            | 0.359                       | 0.618        | 2.678        | 1.006   |
| Malate                                | 0.659                       | <b>0.527</b> | 0.935        | 0.993   |
| Mannitol                              | 0.048                       | 0.843        | 33.337       | 0.012   |
| Nonanoic acid                         | 0.928                       | 0.571        | 1.160        | 2.046   |
| Norleucine                            | 0.730                       | 0.782        | 0.894        | 0.982   |
| Octadecanoate                         | 1.024                       | <b>0.769</b> | 1.292        | 1.082   |
| Oxalate                               | 1.032                       | 0.875        | 0.660        | 1.106   |
| Phenylalanine                         | 1.159                       | 0.805        | 0.636        | 1.267   |
| Phosphate                             | 0.886                       | 0.717        | 1.082        | 0.737   |
| Pyroglutamate                         | 0.411                       | <b>0.361</b> | 0.421        | 1.814   |
| Quinate                               | 1.520                       | <b>0.401</b> | 1.574        | 0.056   |

|                     |       |              |              |       |
|---------------------|-------|--------------|--------------|-------|
| Saccharic acid 6TMS | 0.559 | <b>0.361</b> | 0.804        | 1.542 |
| Serine 3TMS         | 1.048 | 0.419        | 0.607        | 1.277 |
| Succinate           | 0.628 | <b>0.527</b> | <b>1.819</b> | 1.541 |
| Sucrose             | 0.570 | <b>0.611</b> | 0.586        | 0.760 |
| Tetradecanoate      | 1.073 | 0.945        | 1.879        | 1.316 |
| Tyrosine            | 1.825 | 1.024        | 1.188        | 0.311 |
| Urea                | 0.898 | 1.169        | 2.157        | 1.192 |
| Valine              | 0.379 | 0.639        | 0.666        | 1.215 |
| Xylose MX1          | 1.136 | 0.885        | 0.807        | 1.438 |
| Xylose MX2          | 0.807 | 0.789        | 2.730        | 1.852 |
| Unknown             | 0.936 | 0.947        | 0.779        | 1.257 |
| Unknown             | 1.080 | 0.685        | 0.839        | 2.428 |
| Unknown             | 0.736 | 0.959        | 0.980        | 0.884 |
| Unknown             | 0.766 | 2.929        | 1.648        | 2.444 |
| Unknown             | 0.839 | 0.798        | 0.832        | 0.908 |
| Unknown             | 0.787 | <b>0.498</b> | 1.027        | 1.765 |
| Unknown             | 1.690 | 0.715        | 0.547        | 0.868 |
| Unknown             | 0.913 | 0.543        | <b>0.428</b> | 1.153 |
| Unknown             | 1.007 | 0.735        | 1.795        | 0.216 |

**Table S2. Changes in gene expression using the GeneChip® Tomato Genome Array.** This analysis was performed on leaves harvested at 12 h light (noon) in 6-week-old plants. Affymetrix ID, corresponding Genbank and Tomato Accession ID from SolGenomics network, function and Gene Ontology Annotation are given. cDNAs were listed if they varied at least 1.5-fold from the control at  $p < 0.01$ .

| Affymetrix ID          | <i>p</i> -Value | Fold<br>Change | Genbank ID   | Tomato<br>Accession<br>(ITAG2.4) | Gene description based<br>on ITAG2.4 ID   | Function             | Gene<br>Ontology |
|------------------------|-----------------|----------------|--------------|----------------------------------|-------------------------------------------|----------------------|------------------|
| Les.5918.1.S1_at       | 0               | 12.51          | AY224079.1   | Solyc01g094910.2                 | Ferric-chelate reductase <i>fro1</i>      | Catalytic            | GO:0003824       |
| Les.1431.1.A1_at       | 0.001           | 6.75           | BG631562     | Solyc03g119970.2                 | ADP ATP carrier protein                   | Protein binding      | GO: 0005515      |
| LesAffx.14736.1.S1_at  | 0               | -4.38          | AW622136     | Solyc11g066150.1                 | Bifunctional polymyxin resistance protein | Metabolic            | GO:0008152       |
| LesAffx.24134.1.S1_at  | 0.01            | 3.89           | CK720539     | Solyc06g082030.2                 | Gibberellin 2-beta-dioxygenase 7          | Catalytic            | GO:0003824       |
| Les.4902.1.S1_at       | 0.007           | 3.70           | BT012867.1   | Solyc01g108780.2                 | Alpha-hydroxynitrile lyase                | Catalytic            | GO:0003824       |
| Les.4488.1.S1_at       | 0.01            | 3.43           | M61914.1     | Solyc09g008670.2                 | Threonine deaminase td                    | Catalytic            | GO:0003824       |
| LesAffx.68994.1.S1_at  | 0.008           | 2.83           | BM410725     | Solyc04g014730.2                 | Fumarylacetoacetase                       | Catalytic            | GO:0003824       |
| Les.5096.1.S1_at       | 0.001           | 2.68           | BT013271.1   | Solyc06g073080.2                 | Flavonol synthase                         | Catalytic            | GO:0003824       |
| Les.2591.1.S1_at*      | 0.008           | -2.25          | M80608.1     | Solyc01g060020.2                 | Beta-1,3-glucanase mRNA, complete cds     | Metabolic            | GO:0008152       |
|                        |                 |                |              | Solyc01g059990.2                 | Serine/threonine-protein phosphatase 7    | None                 | None             |
| LesAffx.31406.1.S1_at  | 0.005           | -2.24          | BM410312     | Solyc05g005180                   | Similar to naphthoate synthase            | Metabolic            | GO:0008152       |
| Les.5233.1.S1_at       | 0.001           | -2.14          | CN384566*    | Solyc03G123620                   | Pectinesterase                            | Catalytic            | GO:0003824       |
| Les.3299.1.S1_at       | 0.009           | 2.13           | BI933484     | Solyc01g091170.2                 | ARGINASE 2 ARG2                           | Catalytic            | GO:0003824       |
| Les.2572.2.S1_at       | 0.004           | 2.02           | CN385250     | Solyc07g042170.2.1               | Jasmonate ZIM-domain protein 3            | Protein binding      | GO:0005515       |
| LesAffx.52572.1.S1_at  | 0.009           | -1.91          | BI923284     | Solyc02g089540.2                 | CONSTANS 1 CO1 Length = 1611              | Transcription Factor | GO:0003700       |
| Les.2100.1.A1_at       | 0.008           | -1.83          | NO HITS      | NO HITS                          | Unknown protein                           | None                 | None             |
| AFFX-Le_GlutTrans_3_at | 0.009           | 1.83           | AAF22647     | Solyc07g056480.2                 | Glutathione S-transferase/oxidoreductase  | Catalytic            | GO:0003824       |
| Les.5559.1.S1_at       | 0.006           | 1.82           | XP_002516460 | Solyc08g065430.2.1               | N-myc downstream regulated protein 3      | Protein binding      | GO:0005515       |
| LesAffx.64675.1.S1_at  | 0.008           | 1.78           | NP_194722    | Solyc07g018010.2.1               | (bHLH) family protein                     | Transcription Factor | GO:0003700       |
| LesAffx.70226.1.S1_at  | 0.006           | 1.78           | P52578       | Solyc10g052500.1                 | Phenylcoumaran benzylic ether reductase 3 | Catalytic            | GO:0003824       |

|                       |       |       |              |                  |                                                        |                                                                           |            |
|-----------------------|-------|-------|--------------|------------------|--------------------------------------------------------|---------------------------------------------------------------------------|------------|
| Les.178.1.S1_at       | 0.004 | 1.75  | AAA53547     | Solyc07g065090.1 | Polygalacturonase inhibitor protein                    | Signaling receptor                                                        | GO:0038023 |
| Les.4045.1.S1_at      | 0.007 | -1.74 | N/A          | N/A              | N/A                                                    | None                                                                      | None       |
| Les.4044.1.S1_at      | 0.003 | -1.73 | N/A          | N/A              | N/A                                                    | None                                                                      | None       |
| Les.3964.1.S1_at      | 0.005 | 1.69  | XP_002262775 | Solyc08g006320.2 | WRKY transcription factor 11                           | Calmodulin-binding                                                        | GO:0005516 |
| LesAffx.33449.1.A1_at | 0.001 | -1.67 | NP_181797    | Solyc12g010910.1 | Lipase (Fragment)                                      | Metabolic                                                                 | GO:0008152 |
| Les.5072.1.S1_at      | 0.008 | 1.65  | XP_002528534 | Solyc02g068270.2 | Unknown Protein (AHRD V1)                              | None                                                                      | None       |
| LesAffx.61012.2.S1_at | 0.008 | -1.63 | XP_002530612 | Solyc02g092040.1 | LRR receptor-like serine/threonine-protein kinase, RLP | Molecular transducer activity                                             | GO:0060089 |
| Les.4041.1.S1_at      | 0.004 | -1.62 | N/A          | N/A              | N/A                                                    | None                                                                      | None       |
| Les.1287.2.S1_at      | 0.004 | 1.62  | N/A          | N/A              | N/A                                                    | None                                                                      | None       |
| Les.2189.1.S1_at      | 0.003 | 1.62  | CAB08077     | Solyc04g082140.2 | Pectinesterase Z94058                                  | Metabolic                                                                 | GO:0008152 |
| LesAffx.30842.1.S1_at | 0     | 1.61  | NP_180299    | Solyc10g083230.1 | F-box family protein                                   | None                                                                      | None       |
| Les.4011.3.S1_at      | 0.001 | -1.55 | N/A          | N/A              | N/A                                                    | None                                                                      | None       |
| Les.4418.1.A1_s_at    | 0     | -1.55 | Q08655       | Solyc04g071610.2 | Absciscic acid stress ripening 1 Asr1                  | Response to stress                                                        | GO:0006950 |
| LesAffx.53035.1.S1_at | 0.001 | -1.54 | NP_565781    | Solyc06g068050.2 | Nucleic acid binding protein Alba-related              | Nucleic acid binding                                                      | GO:0003676 |
| LesAffx.39917.1.S1_at | 0.005 | 1.53  | NP_189391    | Solyc02g093430.2 | Glycosyl transferase family 17 protein                 | Membrane Regulation                                                       | GO:0016020 |
| Les.3575.1.S1_at      | 0     | 1.52  | O04681       | Solyc02g077370.1 | Ethylene-responsive transcription factor 2             | DNA dependent sequence-specific DNA binding transcription factor activity | GO:0006355 |
| Les.4895.1.S1_at      | 0.005 | 1.52  | CAB65169     | Solyc05g055240.2 | I-box binding factor mybi                              |                                                                           | GO:0003700 |
| Les.5748.1.S1_at      | 0.01  | -1.51 | CAO45289     | Solyc05g053880.2 | cDNA FLJ42396 fis clone ASTRO2001107                   | None                                                                      | None       |
| LesAffx.64585.1.S1_at | 0.002 | 1.51  | NP_001031122 | Solyc03g006250.2 | GDSL esterase/lipase                                   | Catalytic                                                                 | GO:0003824 |
| LesAffx.71442.2.S1_at | 0.01  | -1.50 | XP_002509949 | Solyc08g082170.2 | Glycoside hydrolase family 28 protein                  | Metabolic                                                                 | GO:0008152 |

**Table S3. Identification of the predicted *cis*-elements motifs in promoters of Dof-regulated genes.** <sup>1</sup>*cis*-elements described by O'Mailley et al (2016), Weirauch et al. (2014) and Franco-Zorrilla et al. (2013), using the Find Individual Motif Occurrence (FIMO) software in Motif-based sequence analysis tools (MEME suite) (P < 0.05).

| Predicted Regulatory <i>cis</i> -Elements <sup>1</sup> | Number of motifs | Number of genes | Genes                                                                                                                                                                                                                                                                                                                                                                  |
|--------------------------------------------------------|------------------|-----------------|------------------------------------------------------------------------------------------------------------------------------------------------------------------------------------------------------------------------------------------------------------------------------------------------------------------------------------------------------------------------|
| DOF                                                    | 64               | 20              | Solyc01g094910.2; Solyc11g066150.1; Solyc01g108780.2; Solyc09g008670.2; Solyc06g073080.2; Solyc03g123620.2; Solyc01g091170.2; Solyc07g042170.2; Solyc02g089540.2; Solyc07g056480.2; Solyc07g065090.1; Solyc08g006320.2; Solyc12g010910.1; Solyc02g092040.1; Solyc10g083230.1; Solyc04g071610.2; Solyc02g093430.2; Solyc02g077370.1; Solyc05g055240.2; Solyc05g053880.2 |
| bHLH                                                   | 38               | 12              | Solyc01g094910.2; Solyc03g119970.2; Solyc06g082030.2; Solyc01g108780.2; Solyc09g008670.2; Solyc06g073080.2; Solyc07g042170.2; Solyc07g056480.2; Solyc07g018010.2; Solyc08g006320.2; Solyc04g082140.2; Solyc02g077370.1                                                                                                                                                 |
| MYB                                                    | 33               | 12              | Solyc01g094910.2; Solyc01g108780.2; Solyc09g008670.2; Solyc01g059990.2; Solyc03g123620.2; Solyc01g091170.2; Solyc08g006320.2; Solyc02g068270.2; Solyc02g092040.1; Solyc10g083230.1; Solyc05g055240.2; Solyc03g006250.2                                                                                                                                                 |
| NAC                                                    | 21               | 12              | Solyc09g008670.2; Solyc04g014730.2; Solyc06g073080.2; Solyc01g091170.2; Solyc07g042170.2; Solyc07g018010.2; Solyc07g065090.1; Solyc10g083230.1; Solyc04g071610.2; Solyc02g077370.1; Solyc05g055240.2                                                                                                                                                                   |
| MADs                                                   | 36               | 11              | Solyc01g094910.2; Solyc01g108780.2; Solyc09g008670.2; Solyc01g059990.2; Solyc07g065090.1; Solyc08g006320.2; Solyc02g068270.2; Solyc02g092040.1; Solyc10g083230.1; Solyc04g071610.2; Solyc05g055240.2                                                                                                                                                                   |
| C2H2                                                   | 27               | 11              | Solyc01g094910.2; Solyc03g119970.2; Solyc06g082030.2; Solyc04g014730.2; Solyc05g005180.2; Solyc01g091170.2; Solyc02g089540.2; Solyc08g006320.2; Solyc02g068270.2; Solyc05g055240.2; Solyc08g082170.2                                                                                                                                                                   |
| G2-like                                                | 12               | 9               | Solyc09g008670.2; Solyc06g073080.2; Solyc03g123620.2; Solyc07g065090.1; Solyc04g071610.2; Solyc02g093430.2; Solyc02g077370.1; Solyc05g053880.2; Solyc03g006250.2                                                                                                                                                                                                       |
| HOMEODOMAIN                                            | 16               | 8               | Solyc06g082030.2; Solyc09g008670.2; Solyc01g060020.2; Solyc03g123620.2; Solyc07g018010.2; Solyc04g082140.2; Solyc06g068050.2; Solyc05g053880.2                                                                                                                                                                                                                         |
| ORPHANS                                                | 8                | 8               | Solyc01g094910.2; Solyc09g008670.2; Solyc06g073080.2; Solyc02g089540.2; Solyc07g056480.2; Solyc12g010910.1; Solyc02g092040.1; Solyc05g053880.2                                                                                                                                                                                                                         |
| AP2-EREBP                                              | 54               | 6               | Solyc04g014730.2; Solyc01g060020.2; Solyc01g091170.2; Solyc08g006320.2; Solyc12g010910.1; Solyc04g082140.2                                                                                                                                                                                                                                                             |

|          |    |   |                                                                                                               |
|----------|----|---|---------------------------------------------------------------------------------------------------------------|
| bZIP     | 24 | 6 | Solyc01g094910.2; Solyc06g082030.2; Solyc06g073080.2;<br>Solyc01g091170.2; Solyc07g065090.1; Solyc03g006250.2 |
| GATA     | 13 | 5 | Solyc01g060020.2; Solyc08g065430.2; Solyc07g065090.1;<br>Solyc08g006320.2; Solyc12g010910.1                   |
| TRIHILIX | 13 | 5 | Solyc01g108780.2; Solyc04g014730.2; Solyc08g065430.2;<br>Solyc02g092040.1; Solyc04g071610.2                   |
| WRK      | 9  | 5 | Solyc11g066150.1; Solyc07g018010.2; Solyc07g065090.1;<br>Solyc08g006320.2; Solyc10g083230.1                   |
| ERF      | 6  | 4 | Solyc01g060020.2; Solyc01g059990.2; Solyc01g091170.2;<br>Solyc08g006320.2                                     |

**Table S4. Members of the *zDof* gene family with proven roles in altering metabolism and storage product accumulation.** The sequence of each gene was identified, analyzed by BLAST to find the closest Arabidopsis homologue and the subclass determined.

| Species     | Gene                              | Gene role in storage product accumulation                                                                                          | Arabidopsis homologues | Dof Sub Group | Ref* |
|-------------|-----------------------------------|------------------------------------------------------------------------------------------------------------------------------------|------------------------|---------------|------|
| Soybean     | <i>GmDof4</i>                     | Increase fatty acids and lipids content when overexpressed in soybean.                                                             | AT5G60850              | A             | [1]  |
| Soybean     | <i>GmDof4</i>                     | Enhance lipid content when expressed in <i>Chlorella ellipsoidea</i> .                                                             | AT5G60850              | A             | [2]  |
| Soybean     | <i>GmDof11</i>                    | Increase fatty acids and lipids content when overexpressed in soybean.                                                             | AT2G46590              | C2.1          | [1]  |
| Maize       | <i>ZmDof1</i>                     | Increase C and N assimilation under low N when expressed in rice.                                                                  | AT1G07640              | B1            | [3]  |
| Maize       | <i>ZmDof36</i>                    | Increase in starch accumulation                                                                                                    | AT3G45610              | C2.1          | [4]  |
| Wheat       | <i>TaDof1</i>                     | Increase expression level under low N in wheat.                                                                                    | AT2G37590              | B1            | [5]  |
| Rice        | <i>OsDof25</i>                    | Increase ammonium transporters level and affect N metabolism when overexpressed in Arabidopsis.                                    | AT2G37590              | B1            | [6]  |
| Arabidopsis | <i>Dof1</i>                       | Increase N assimilation under low N when overexpressed in tobacco.                                                                 | AT1G51700              | A             | [7]  |
| Sweet       | <i>SRF1</i>                       | Higher starch, less sugar when overexpressed in sweet potato.                                                                      | AT5G39660              | D1            | [8]  |
| Canola      | <i>BnDof5.6</i>                   | Decrease fatty acid content and alter seed fatty acids composition in a <i>BnDof5.6</i> down-regulated canola line.                | AT5G62940              | C1            | [9]  |
| Kiwifruit   | <i>AdDof3</i>                     | Starch degradation during fruit ripening.                                                                                          | AT2G37590              | B1            | [10] |
| Tomato      | <i>AtCDF3</i><br><i>/AtDof3.3</i> | Ectopic overexpression in tomato increased fruit and vegetative biomass and improved plant response under limited and sufficient N | AT3G47500              | D1            | [11] |
| Tomato      | <i>SlCDF4</i>                     | Overexpression in tomato increased fruit yield and vegetative biomass and improved plant response under limited and sufficient N   | Not reported           | D             | [12] |

1. Wang, H.W.; Zhang, B.; Hao, Y.J.; Huang, J.; Tian, A.G.; Liao, Y.; Zhang, J.S.; Chen, S.Y. The soybean Dof-type transcription factor genes, GmDof4 and GmDof11, enhance lipid content in the seeds of transgenic Arabidopsis plants. *The Plant journal : for cell and molecular biology* **2007**, 52, 716-729, doi:10.1111/j.1365-313X.2007.03268.x.
2. Zhang, J.; Hao, Q.; Bai, L.; Xu, J.; Yin, W.; Song, L.; Xu, L.; Guo, X.; Fan, C.; Chen, Y. Overexpression of the soybean transcription factor GmDof4 significantly enhances the lipid content of *Chlorella ellipsoidea*. *Biotechnology for biofuels* **2014**, 7, 128.
3. Kurai, T.; Wakayama, M.; Abiko, T.; Yanagisawa, S.; Aoki, N.; Ohsugi, R. Introduction of the ZmDof1 gene into rice enhances carbon and nitrogen assimilation under low-nitrogen conditions. *Plant Biotechnology Journal* **2011**, 9, 826-837.
4. Wu, J.; Chen, L.; Chen, M.; Zhou, W.; Dong, Q.; Jiang, H.; Cheng, B. The DOF-Domain Transcription Factor ZmDOF36 Positively Regulates Starch Synthesis in Transgenic Maize. *Frontiers in Plant Science* **2019**, 10, doi:10.3389/fpls.2019.00465.



5. Kumar, R.; Taware, R.; Gaur, V.S.; Guru, S.K.; Kumar, A. Influence of nitrogen on the expression of TaDof1 transcription factor in wheat and its relationship with photo synthetic and ammonium assimilating efficiency. *Molecular biology reports* **2009**, *36*, 2209-2220, doi:10.1007/s11033-008-9436-8.
6. Santos, L.A.; de Souza, S.R.; Fernandes, M.S. OsDof25 expression alters carbon and nitrogen metabolism in Arabidopsis under high N-supply. *Plant biotechnology reports* **2012**, *6*, 327-337.
7. Wang, Y.; Fu, B.; Pan, L.; Chen, L.; Fu, X.; Li, K. Overexpression of Arabidopsis Dof1, GS1 and GS2 enhanced nitrogen assimilation in transgenic tobacco grown under low-nitrogen conditions. *Plant Molecular Biology Reporter* **2013**, *31*, 886-900.
8. Tanaka, M.; Takahata, Y.; Nakayama, H.; Nakatani, M.; Tahara, M. Altered carbohydrate metabolism in the storage roots of sweetpotato plants overexpressing the SRF1 gene, which encodes a Dof zinc finger transcription factor. *Planta* **2009**, *230*, 737-746.
9. Deng, W.; Yan, F.; Zhang, X.; Tang, Y.; Yuan, Y. Transcriptional profiling of canola developing embryo and identification of the important roles of BnDof5.6 in embryo development and fatty acids synthesis. *Plant & cell physiology* **2015**, *56*, 1624-1640, doi:10.1093/pcp/pcv074.
10. Zhang, A.D.; Wang, W.Q.; Tong, Y.; Li, M.J.; Grierson, D.; Ferguson, I.; Chen, K.S.; Yin, X.R. Transcriptome Analysis Identifies a Zinc Finger Protein Regulating Starch Degradation in Kiwifruit. *Plant Physiol* **2018**, *178*, 850-863.
11. Domínguez-Figueroa, J.; Carrillo, L.; Renau-Morata, B.; Yang, L.; Molina, R.V.; Marino, D.; Canales, J.; Weih, M.; Vicente-Carbajosa, J.; Nebauer, S.G.; et al. The Arabidopsis Transcription Factor CDF3 Is Involved in Nitrogen Responses and Improves Nitrogen Use Efficiency in Tomato. *Front Plant Sci* **2020**, *11*, 601558, doi:10.3389/fpls.2020.601558.
12. Renau-Morata, B.; Carrillo, L.; Cebolla-Cornejo, J.; Molina, R.V.; Martí, R.; Domínguez-Figueroa, J.; Vicente-Carbajosa, J.; Medina, J.; Nebauer, S.G. The targeted overexpression of SICDF4 in the fruit enhances tomato size and yield involving gibberellin signalling. *Sci Rep* **2020**, *10*, 10645, doi:10.1038/s41598-020-67537-x.
